# Supplementary material for: Topological flat bands in frustrated kagome lattice CoSn
Source: PubMed Central journal article supplement (PMC7417556; doi:10.1038/s41467-020-17465-1), 2020-08-10
Supplement: 41467_2020_17465_MOESM2_ESM.pdf [file 41467_2020_17465_MOESM2_ESM.pdf]

Editorial Note: This manuscript has been previously reviewed at another journal that is not operating a transparent peer review scheme. The manuscript was considered suitable for publication without further review at Nature Communications .
